# Supplementary material
Source: PubMed Central journal article supplement (PMC10472266)
Supplement: jamaotolaryngolheadnecksurg-e232420-s001.pdf [file jamaotolaryngolheadnecksurg-e232420-s001.pdf]

## Data Sharing Statement

Ramkumar. Differences in Receipt of Immunotherapy Treatment Among Patients With Head and Neck Cancer. *JAMA Otolaryngol Head Neck Surg*. Published August 31, 2023.

doi:10.1001/jamaoto.2023.2420

### Data

**Data available:** Yes

**Data types:** Deidentified participant data

**How to access data:** Data used for this study is from Navigating Cancer. Please send requests for data use to the corresponding author.

**When available:** With publication

### Supporting Documents

**Document types:** None

### Additional Information

**Who can access the data:** Researchers requested data whose request has been approved.

**Types of analyses:** For clinical epidemiology research

**Mechanisms of data availability:** Data may be available after approval and signed user agreement
